# Supplementary material
Source: PubMed Central journal article supplement (PMC6542267)
Supplement: NIHMS1030455-supplement-Supplemental.pdf [file NIHMS1030455-supplement-Supplemental.pdf]

## Supplementary Information

# RNA Micelles for Systemic Delivery of Anti-miRNA for Cancer Targeting and Inhibition without Ligand

Hongran Yin, †,‡,§,⊥ Hongzhi Wang, †,‡,§,⊥ Zhefeng Li, †,‡,§,⊥ Dan Shu, \*,†,‡,§,⊥ Peixuan Guo\*,†,‡,§,⊥

† Center for RNA Nanobiotechnology and Nanomedicine, ‡Division of Pharmaceutics and Pharmaceutical Chemistry, College of Pharmacy, §Dorothy M. Davis Heart and Lung Research Institute, College of Medicine, and ⊥James Comprehensive Cancer Center. The Ohio State University, Columbus, OH 43210, USA.



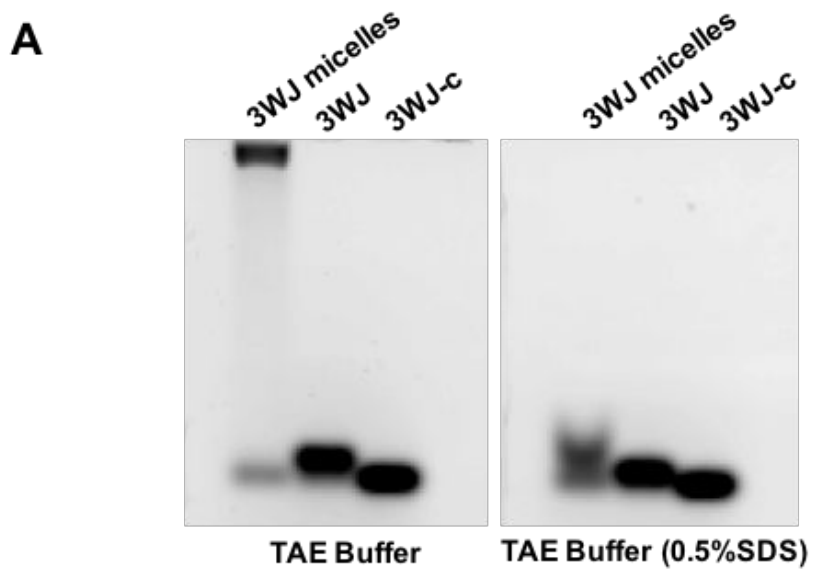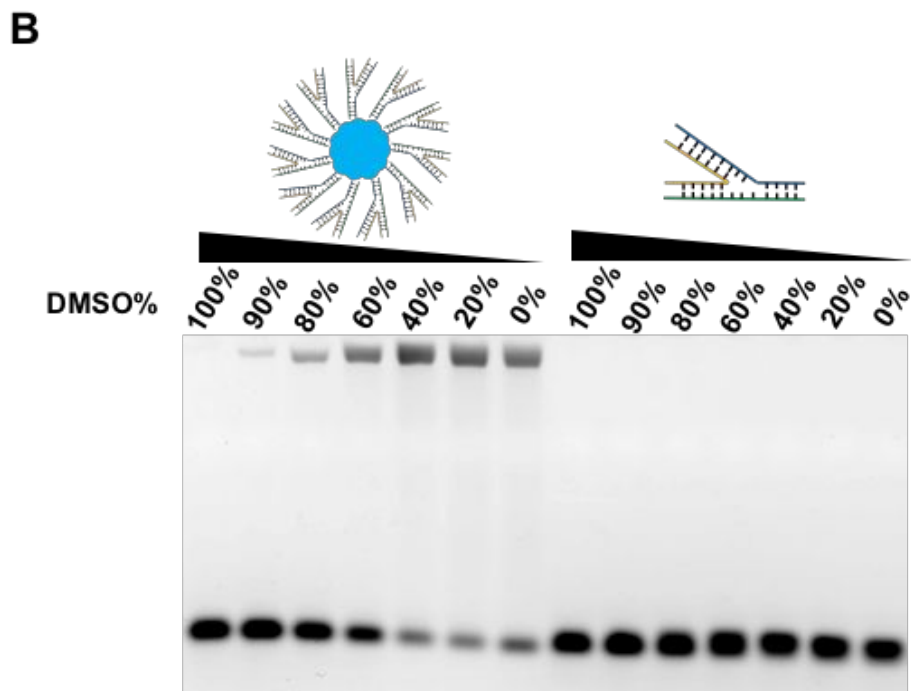

**Supplementary Figure. 2. Evaluation of micelles formation by hydrophobic force.**  
**A.** 2% Agarose gel comparing 3WJ RNA micelles formation in TAE running buffer with or without 0.5% SDS. **B.** 2% Agarose gel showing 3WJ RNA micelles and 3WJ assembly in the presence of increasing percent of DMSO.

**A**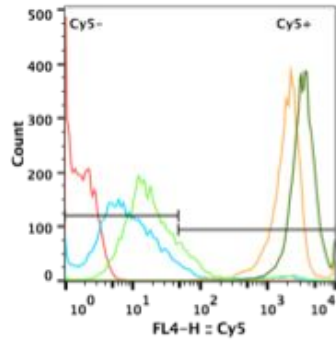

|                                                                                   |                            |       |
|-----------------------------------------------------------------------------------|----------------------------|-------|
|  | 3WJ/FA/anti-miR21 micelles | 100%  |
|  | 3WJ/FA/anti-miR21          | 18.9% |
|  | 3WJ/anti-miR21 micelles    | 99.9% |
|  | 3WJ/anti-miR21             | 9.74% |
|  | Cell only                  | 0%    |

**B**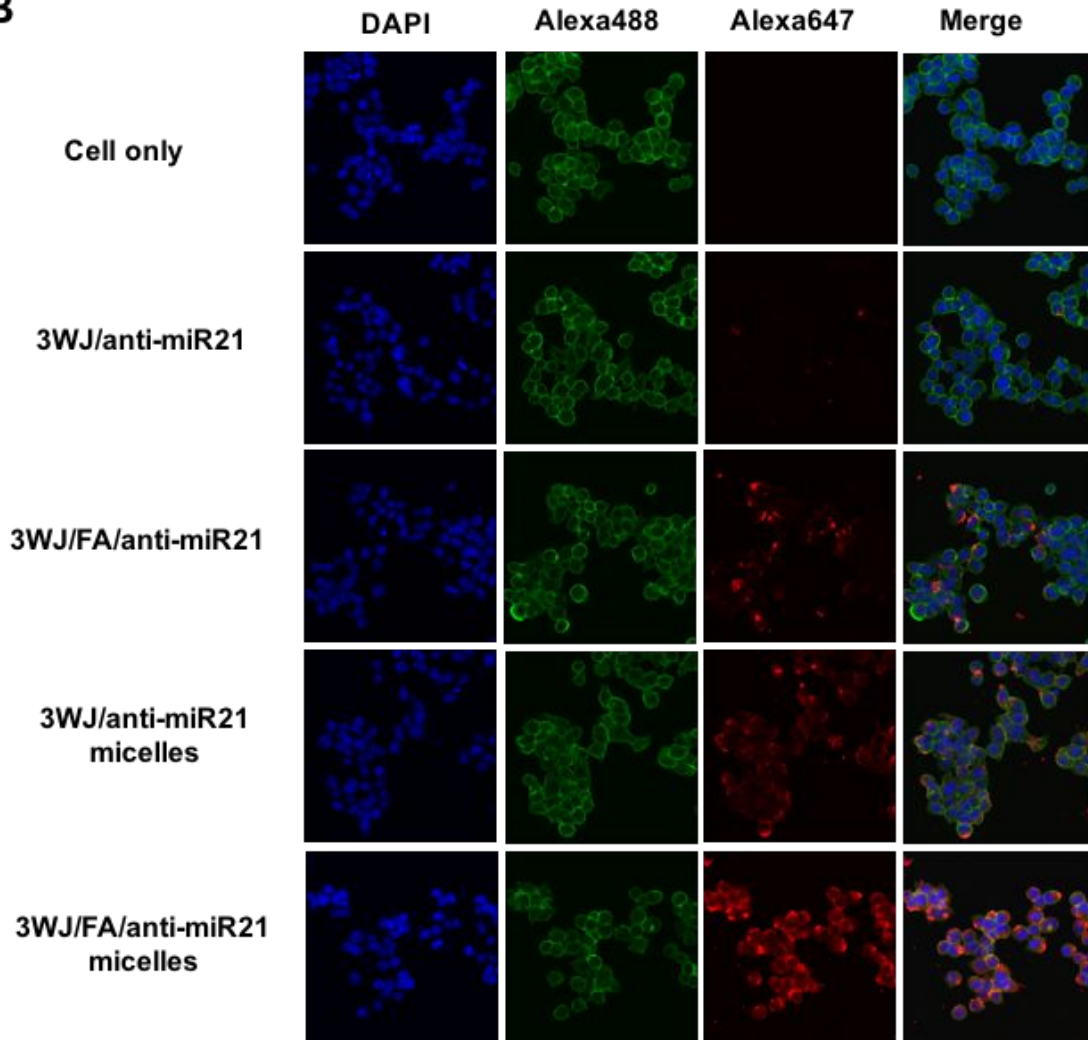

**Supplementary Figure. 3. *In vitro* binding and internalization of RNA micelles to colon cancer HT29 cell. A.** Flow cytometry comparing binding affinity to HT29 cells after treatment for 1hr. **B.** Confocal microscope showing internalization profile. Blue: nuclei; Green: cytoskeleton; Red: RNA nanoparticles.

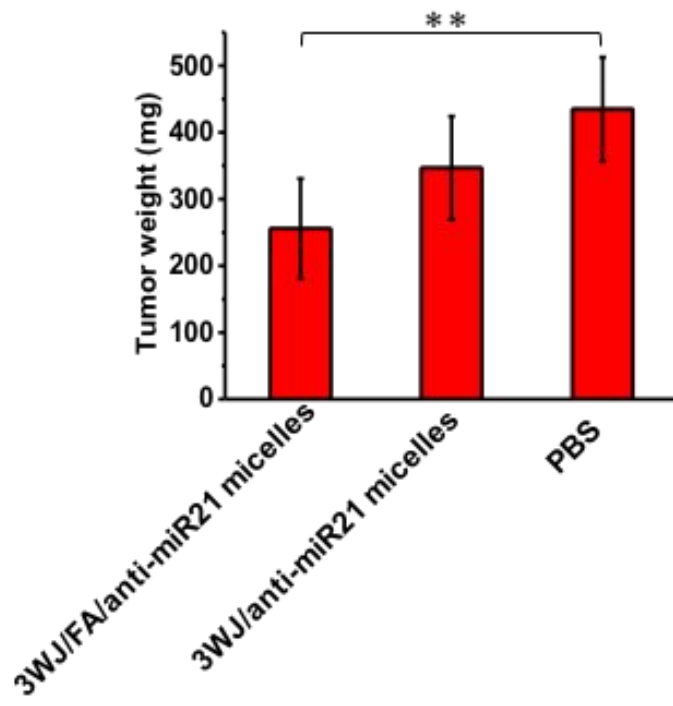

Supplementary Figure. 4. The weight of tumors harvested from mice at day10.
